# Supplementary material
Source: publisher figshare collection journal article supplement (https://acs.figshare.com/ndownloader/files/12978431)
Supplement: Supplementary file 1 [file 12978431]

## Supporting Information

### Determination and Correlation of the Solubility of L-Fucose in Four Binary Solvent Systems at the Temperature Range from 288.15 K to 308.15 K

Jingxuan Qiu<sup>†</sup>, Shuang Song<sup>†</sup>, Xinglong Chen<sup>†</sup>, Dengjing Yi<sup>†§</sup>, Mengyao An<sup>‡§</sup>, and Peng Wang<sup>\*†§</sup>

<sup>†</sup> School of Chemical Engineering, <sup>‡</sup> School of Chemical and Life Science, and <sup>§</sup> Advanced Institute of Materials Science Changchun University of Technology, Changchun, Jilin 130012, People's Republic of China

#### Corresponding Author

\*Tel: +86-431-85968101, Fax: +86-431-85968101, Email: [pengwang@ccut.edu.cn](mailto:pengwang@ccut.edu.cn)

## Figure Captions

**Figure S1.** Experimental ( $x_A^{\text{exp}}$ ) solubility scatter diagram of  $\text{L}$ -fucose in methanol + water at the temperature range from 288.15 K to 308.15 K

**Figure S2.** Experimental ( $x_A^{\text{exp}}$ ) solubility scatter diagram of  $\text{L}$ -fucose in ethanol + water at the temperature range from 288.15 K to 308.15 K

**Figure S3.** Experimental ( $x_A$ ) solubility scatter diagram of  $\text{L}$ -fucose in 2-propanol + water at the temperature range from 288.15 K to 308.15 K

**Figure S4.** Experimental ( $x_A$ ) solubility scatter diagram of  $\text{L}$ -fucose in acetone + water at the temperature range from 288.15 K to 308.15 K

**Figure S5.** Apelblat-Jouyban-Acree model fitting plot of  $\ln(x_A)$  versus  $T$  (from 288.15 K to 308.15 K) and  $x_1$  (from 0.0 to 1.0) for  $\text{L}$ -fucose solubility in the full range in methanol + water

**Figure S6.** Apelblat-Jouyban-Acree model fitting plot of  $\ln(x_A)$  versus  $T$  (from 288.15 K to 308.15 K) and  $x_1$  (from 0.0 to 1.0) for  $\text{L-fucose}$  solubility in the full range in ethanol + water

**Figure S7.** Apelblat-Jouyban-Acree model fitting plot of  $\ln(x_A)$  versus  $T$  (from 288.15 K to 308.15 K) and  $x_1$  (from 0.0 to 1.0) for  $\text{L-fucose}$  solubility in the full range in 2-propanol + water

**Figure S8.** Apelblat-Jouyban-Acree model fitting plot of  $\ln(x_A)$  versus  $T$  (from 288.15 K to 308.15 K) and  $x_1$  (from 0.0 to 1.0) for  $\text{L-fucose}$  solubility in the full range in acetone + water

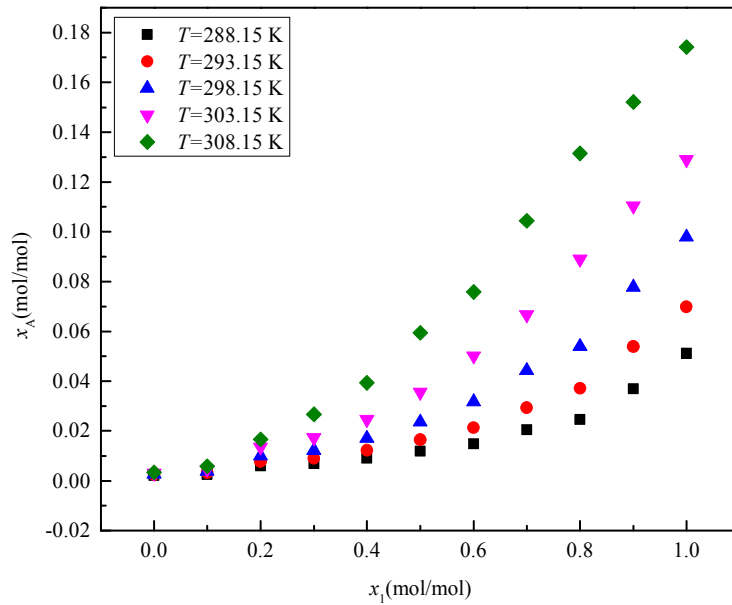

**Figure S1.** Experimental ( $x_A^{\text{exp}}$ ) solubility scatter diagram of  $_L$ -fucose in methanol + water at the temperature range from 288.15 K to 308.15 K

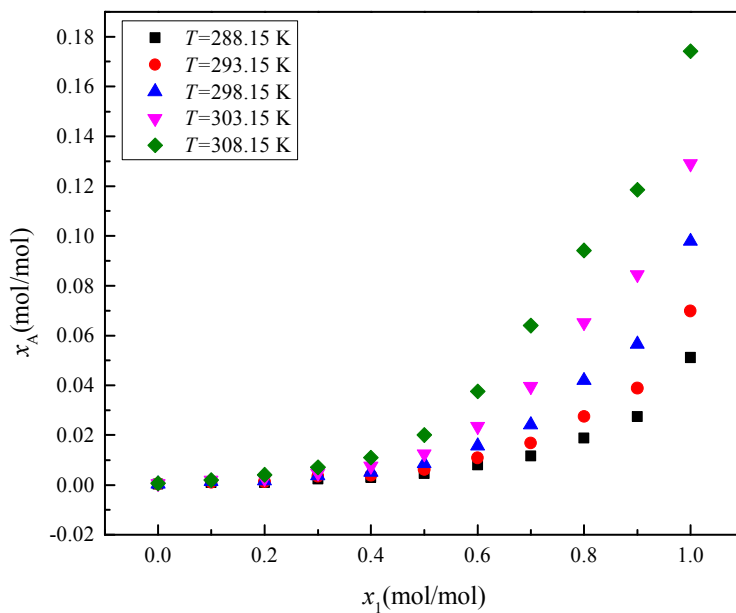

**Figure S2.** Experimental ( $x_A^{\text{exp}}$ ) solubility scatter diagram of  $_L$ -fucose in ethanol + water at the temperature range from 288.15 K to 308.15 K

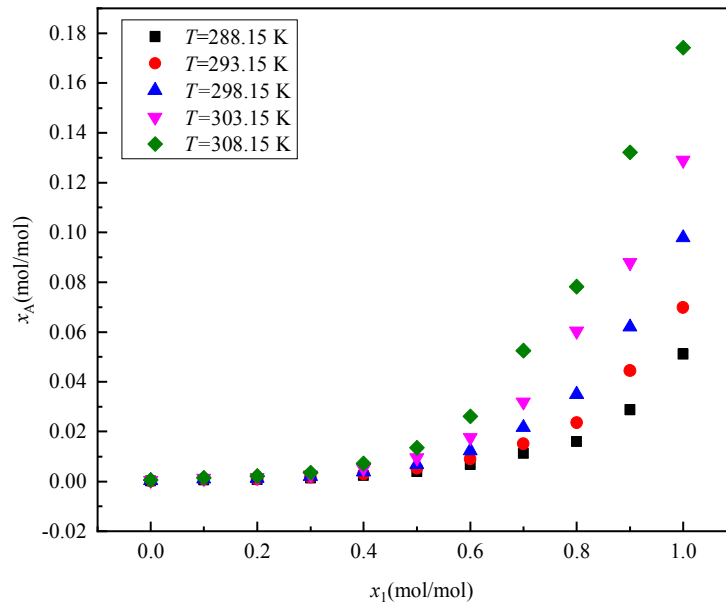

**Figure S3.** Experimental ( $x_A$ ) solubility scatter diagram of  $L$ -fucose in 2-propanol + water at the temperature range from 288.15 K to 308.15 K

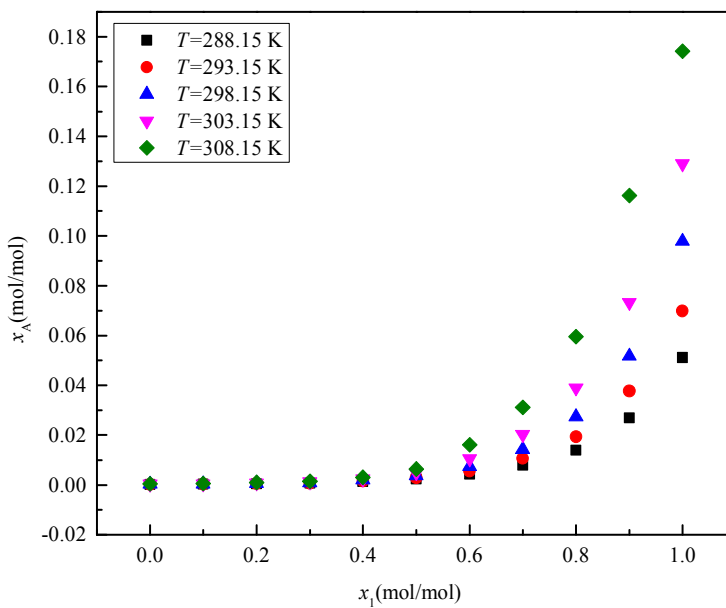

**Figure S4.** Experimental ( $x_A$ ) solubility scatter diagram of  $L$ -fucose in acetone + water at the temperature range from 288.15 K to 308.15 K

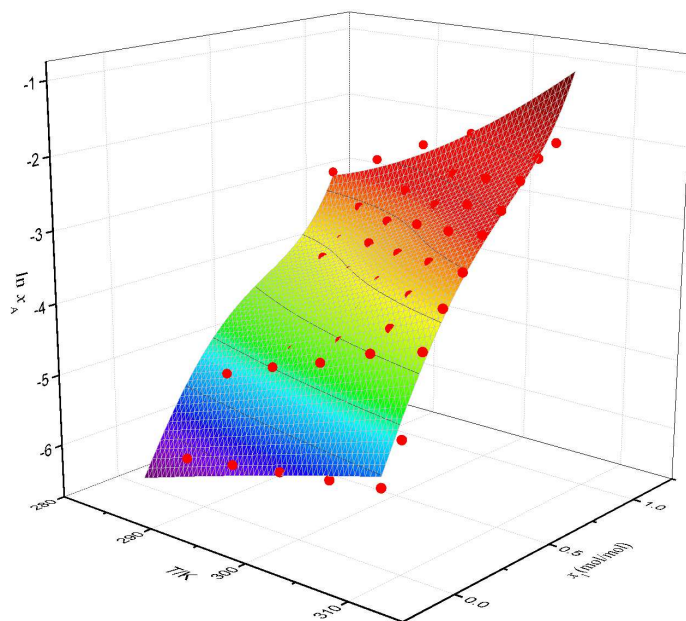

**Figure S5.** Apelblat-Jouyban-Acree model fitting plot of  $\ln(x_A)$  versus  $T$  (from 288.15 K to 308.15 K) and  $x_1$  (from 0.0 to 1.0) for  $_L$ -fucose solubility in the full range in methanol + water

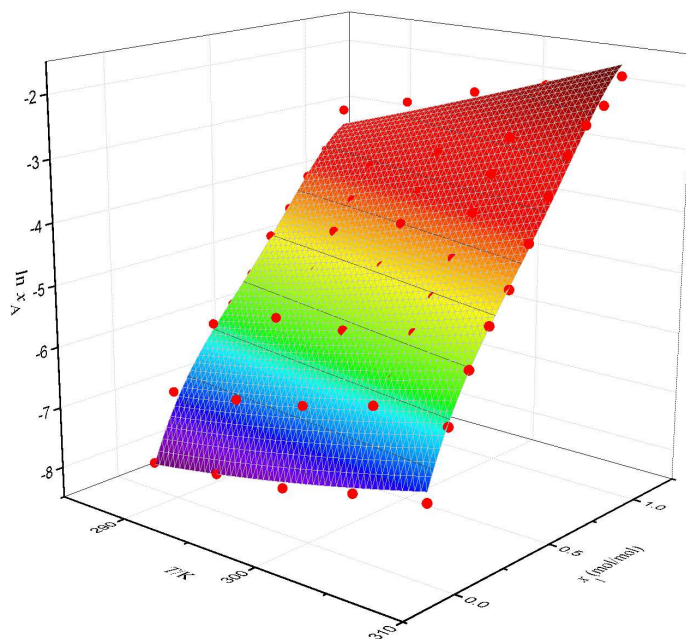

**Figure S6.** Apelblat-Jouyban-Acree model fitting plot of  $\ln(x_A)$  versus  $T$  (from 288.15 K to 308.15 K) and  $x_1$  (from 0.0 to 1.0) for  $_L$ -fucose solubility in the full range in ethanol + water

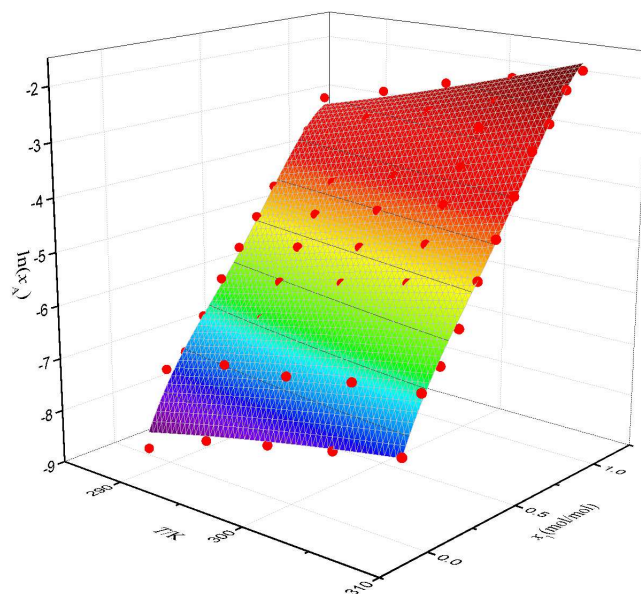

**Figure S7.** Apelblat-Jouyban-Acree model fitting plot of  $\ln(x_A)$  versus  $T$  (from 288.15 K to 308.15 K) and  $x_1$  (from 0.0 to 1.0) for  $L$ -fucose solubility in the full range in 2-propanol + water

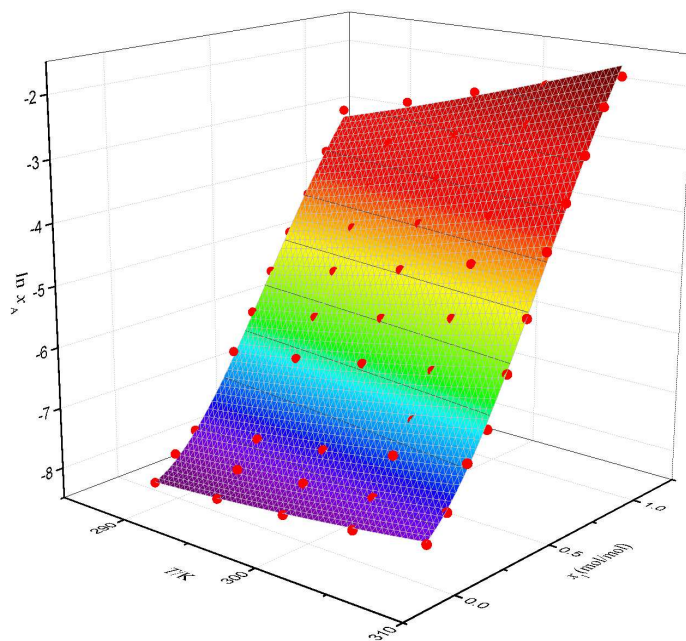

**Figure S8.** Apelblat-Jouyban-Acree model fitting plot of  $\ln(x_A)$  versus  $T$  (from 288.15 K to 308.15 K) and  $x_1$  (from 0.0 to 1.0) for  $L$ -fucose solubility in the full range in acetone + water
